# Supplementary material for: Nanoceria-modified platinum supported on hierarchical zeolites for selective alcohol oxidation
Source: Royal Society of Chemistry journal article supplement (doi:10.1039/c9ra07793f), 2019-01-01
Supplement: c9ra07793f1.pdf [file c9ra07793f1.pdf]

## Supplementary information

### **Nanoceria-modified platinum supported on hierarchical zeolites for selective alcohol oxidation**

Marisa Ketkaew,<sup>a</sup> Duangkamon Suttiapat,<sup>a</sup> Pinit Kidkhunthod<sup>b</sup>,

Thongthai Witoon<sup>c</sup> and Chularat Wattanakit<sup>a\*</sup>

<sup>a</sup>Department of Chemical and Biomolecular Engineering, School of Energy Science and Engineering, Vidyasirimedhi Institute of Science and Technology, Rayong, 21210, Thailand

<sup>b</sup>Synchrotron Light Research Institute (Public Organization), 111 University Avenue, Muang District, Nakhon Ratchasima, 30000 Thailand

<sup>c</sup>Department of Chemical Engineering, Faculty of Engineering, Kasetsart University, Bangkok 10900, Thailand

\*Corresponding author: E-mail [Chularat.w@vistec.ac.th](mailto:Chularat.w@vistec.ac.th)

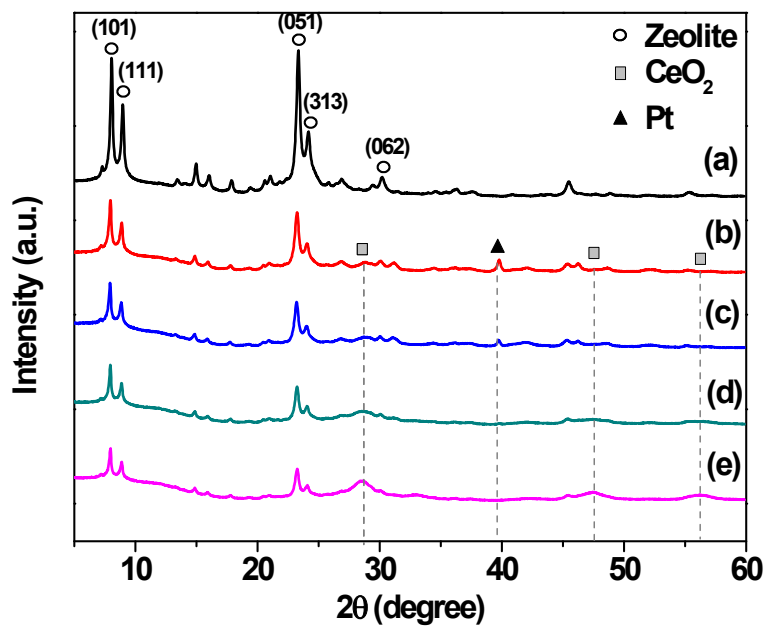

**Fig. S1** XRD patterns of Pt/ $\text{CeO}_2$  supported on hierarchical zeolites obtained using different  $\text{CeO}_2$  loading: (a) Silicalite1-HIE; (b) 1Pt/5 $\text{CeO}_2$ -Silicalite1-HIE; (c) 1Pt/10 $\text{CeO}_2$ -Silicalite1-HIE; (d) 1Pt/20 $\text{CeO}_2$ -Silicalite1-HIE; (e) 1Pt/30 $\text{CeO}_2$ -Silicalite1-HIE.

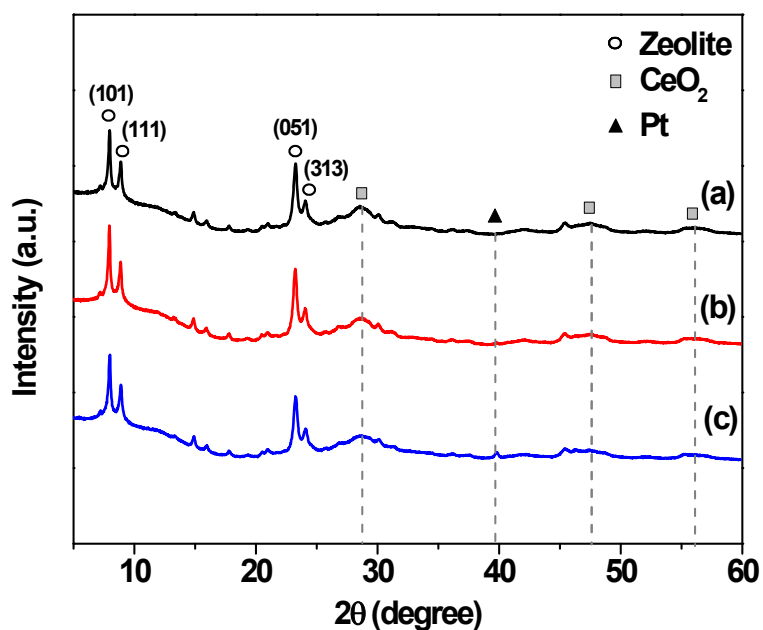

**Fig. S2** XRD patterns of Pt/ $\text{CeO}_2$  supported on hierarchical zeolites obtained using different Pt loading: (a) 0.5Pt/20 $\text{CeO}_2$ -Silicalite1-HIE; (b) 1Pt/20 $\text{CeO}_2$ -Silicalite1-HIE; (c) 2Pt/20 $\text{CeO}_2$ -Silicalite1-HIE.

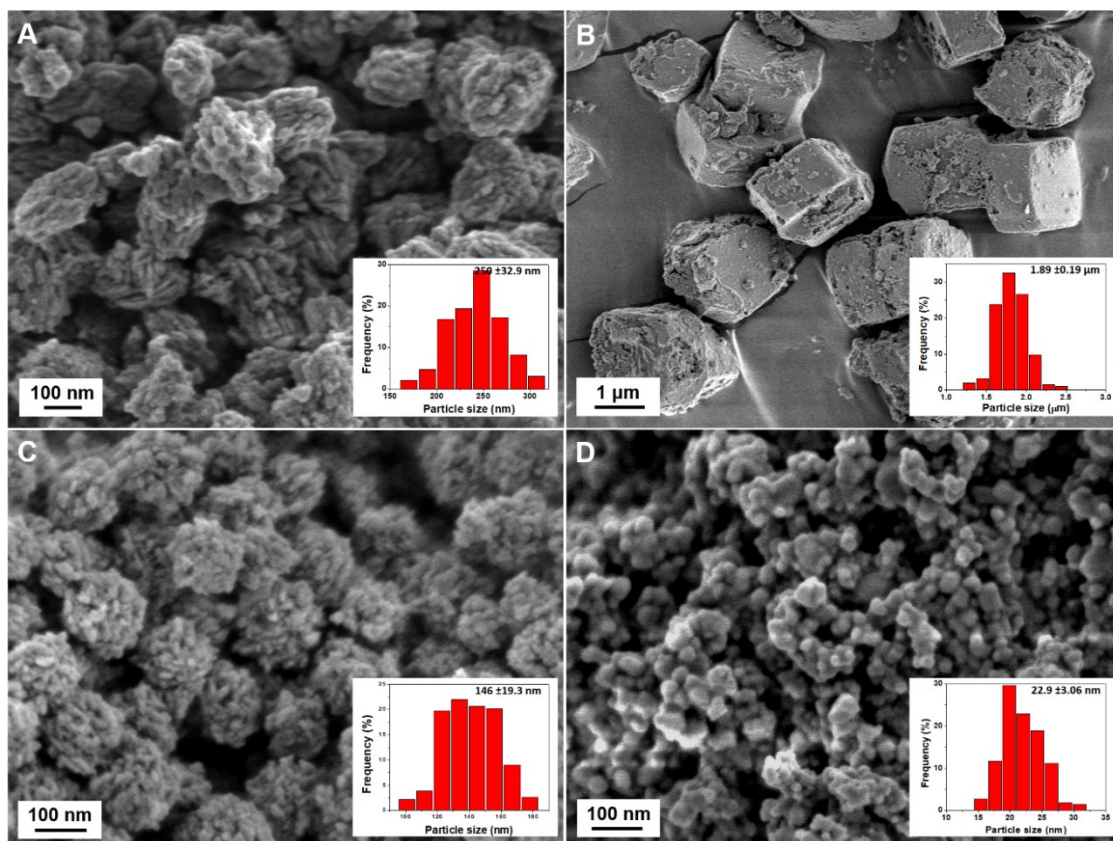

**Fig. S3** SEM images of (A) 1Pt/20CeO<sub>2</sub>-Silicalite1-HIE; (B) 1Pt/20CeO<sub>2</sub>-Silicalite1-CON; (C) 1Pt/20CeO<sub>2</sub>-ZSM5-HIE; (D) 1Pt/CeO<sub>2</sub>.

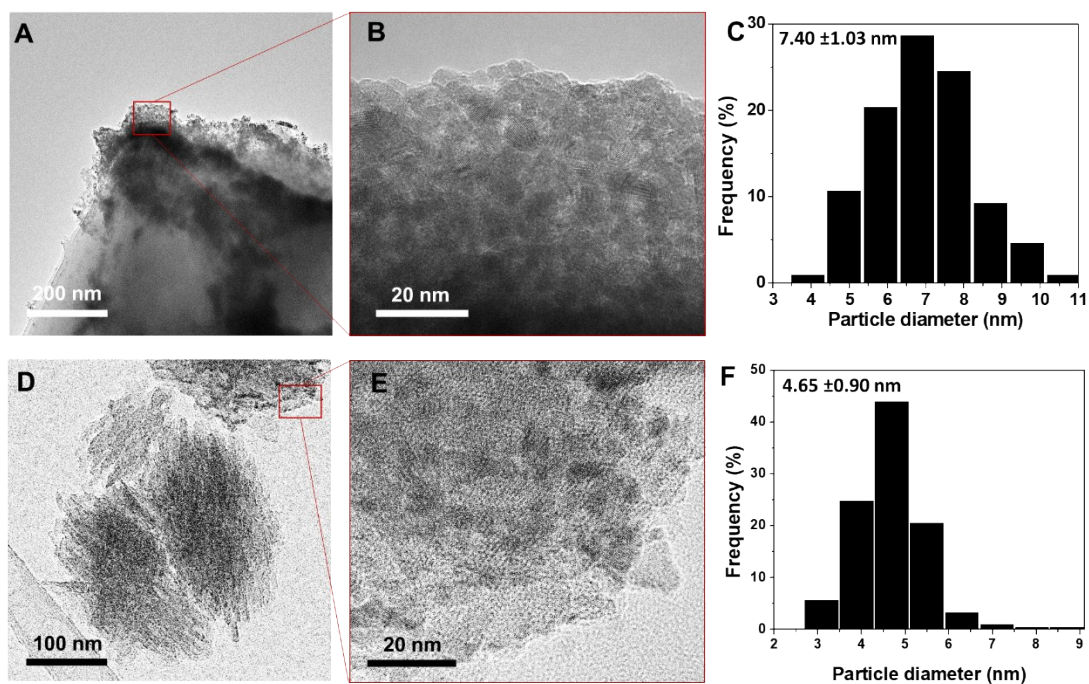

**Fig. S4** TEM images and the particle size distribution of (A-C) 1Pt/20CeO<sub>2</sub>-Silicalite1-CON; (D-F) 1Pt/20CeO<sub>2</sub>-Silicalite1-HIE.

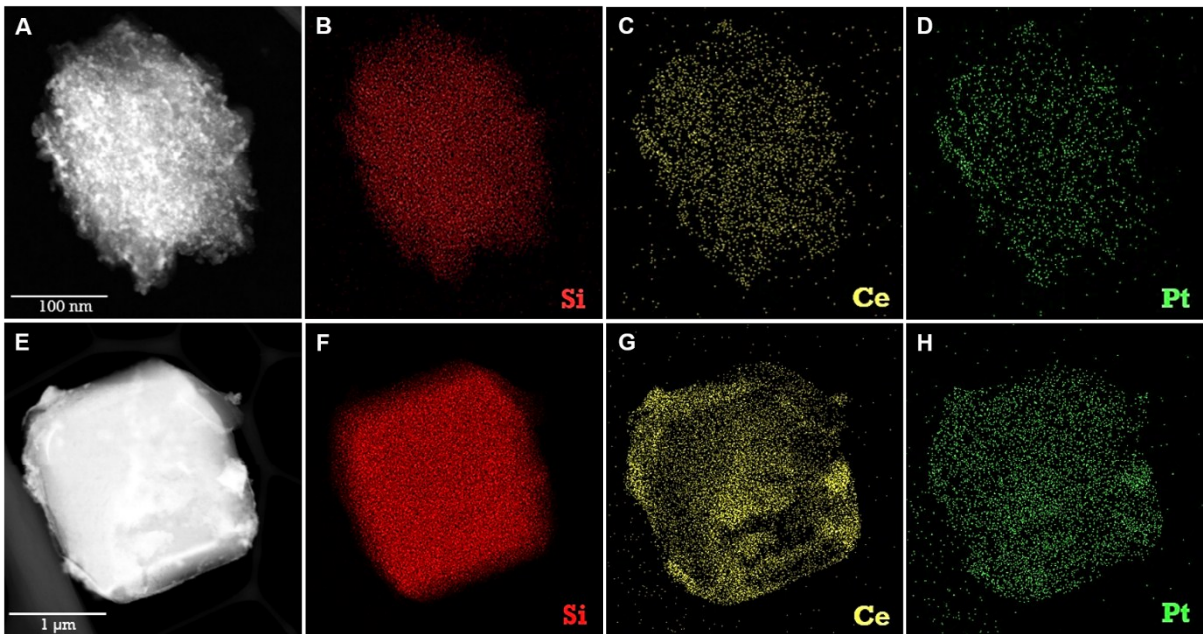

**Fig. S5** TEM-EDX images of (A-D) 1Pt/20CeO<sub>2</sub>-Silicalite1-HIE; (E-H) 1Pt/20CeO<sub>2</sub>-Silicalite1-CON.

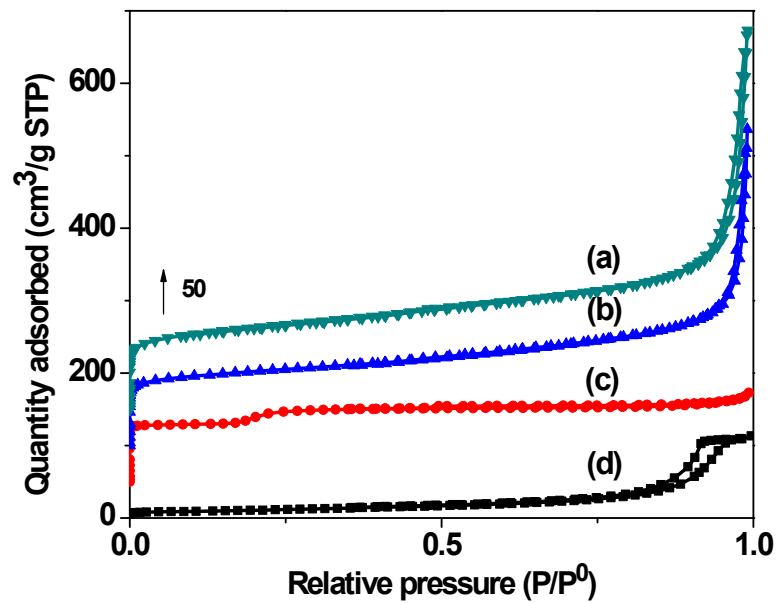

**Fig. S6** N<sub>2</sub> adsorption/desorption isotherms of (a) 1Pt/20CeO<sub>2</sub>-ZSM5-HIE; (b) 1Pt/20CeO<sub>2</sub>-Silicalite1-HIE; (c) 1Pt/20CeO<sub>2</sub>-Silicalite1-CON; (d) 1Pt/CeO<sub>2</sub>.

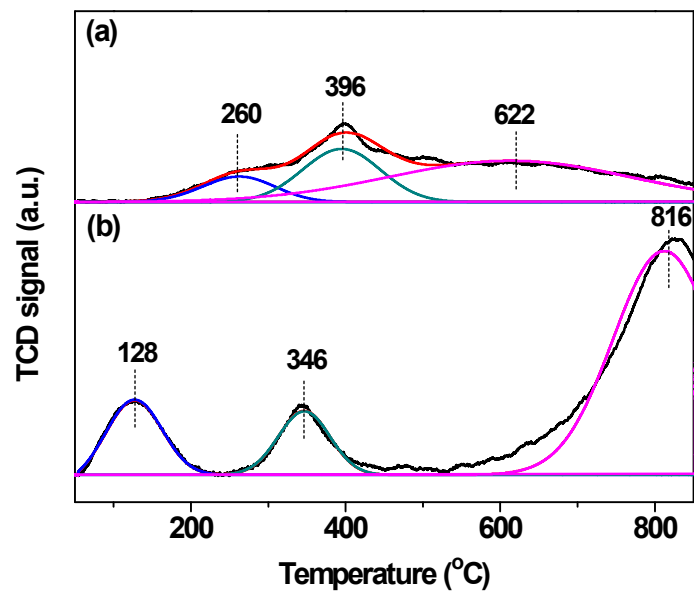

Fig. S7 H<sub>2</sub>-Temperature programmed reduction (H<sub>2</sub>-TPR) profiles of (a) 1Pt/20CeO<sub>2</sub>-ZSM5-HIE and (b) 1Pt/CeO<sub>2</sub>.

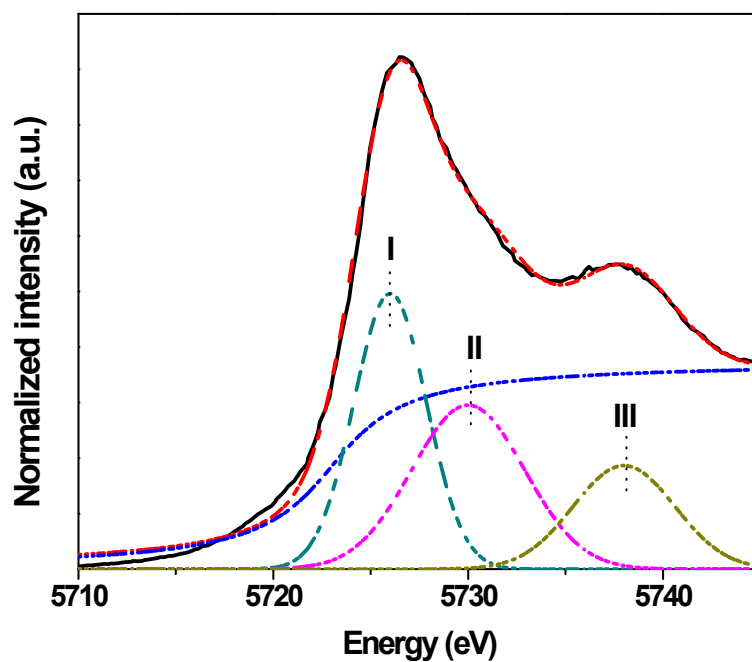

Fig. S8 Fitting curves of XANES spectra of the Ce L<sub>3</sub> edge for 1Pt/20CeO<sub>2</sub>-ZSM5-HIE.

**Table S1** Textural properties

| Catalyst                                | Si/Al ratio <sup>a</sup> | Pt dispersion <sup>b</sup> (%) | Particle size <sup>b</sup> (nm) | S <sub>BET</sub> <sup>c</sup> (m <sup>2</sup> g <sup>-1</sup> ) | S <sub>ext</sub> <sup>d</sup> (m <sup>2</sup> g <sup>-1</sup> ) | S <sub>micro</sub> <sup>e</sup> (m <sup>2</sup> g <sup>-1</sup> ) | V <sub>total</sub> <sup>f</sup> (cm <sup>3</sup> g <sup>-1</sup> ) | V <sub>micro</sub> <sup>g</sup> (cm <sup>3</sup> g <sup>-1</sup> ) | V <sub>ext</sub> <sup>h</sup> (cm <sup>3</sup> g <sup>-1</sup> ) |
|-----------------------------------------|--------------------------|--------------------------------|---------------------------------|-----------------------------------------------------------------|-----------------------------------------------------------------|-------------------------------------------------------------------|--------------------------------------------------------------------|--------------------------------------------------------------------|------------------------------------------------------------------|
| 1Pt/20CeO <sub>2</sub> -ZSM5-HIE        | 110.2                    | 37.89                          | 2.99                            | 404.86                                                          | 225.48                                                          | 179.38                                                            | 0.80                                                               | 0.003                                                              | 0.80                                                             |
| 1Pt/20CeO <sub>2</sub> -Silicalite1-HIE | ∞                        | 29.57                          | 3.83                            | 375.69                                                          | 164.35                                                          | 211.34                                                            | 0.66                                                               | 0.03                                                               | 0.63                                                             |
| 1Pt/20CeO <sub>2</sub> -Silicalite1-CON | ∞                        | 17.65                          | 6.41                            | 331.45                                                          | 13.98                                                           | 317.47                                                            | 0.19                                                               | 0.15                                                               | 0.04                                                             |
| 1Pt/CeO <sub>2</sub>                    | -                        | -                              | 1.74                            | 38.58                                                           | 6.03                                                            | 32.55                                                             | 0.17                                                               | 0.16                                                               | 0.02                                                             |

<sup>a</sup> Si/Al determined by wavelength dispersive x-ray fluorescence.

<sup>b</sup> Pt dispersion and average particle size were determined by H<sub>2</sub>-pulse method.

<sup>c</sup> S<sub>BET</sub>: Specific surface area (m<sup>2</sup>g<sup>-1</sup>) determined by BET method.

<sup>d</sup> S<sub>ext</sub>: External surface area (m<sup>2</sup>g<sup>-1</sup>).

<sup>e</sup> S<sub>micro</sub>: micropore surface area (m<sup>2</sup>g<sup>-1</sup>), determined by t-plot method.

<sup>f</sup> V<sub>total</sub>: total pore volume (cm<sup>3</sup>g<sup>-1</sup>) obtained at P/P<sub>0</sub>=0.90.

<sup>g</sup> V<sub>micro</sub>: micropore volume (cm<sup>3</sup>g<sup>-1</sup>), determined by t-plot method.

<sup>h</sup> V<sub>ext</sub>: external pore volume (cm<sup>3</sup>g<sup>-1</sup>), V<sub>ext</sub>=V<sub>total</sub>-V<sub>micro</sub>.

**Table S2** Quantitative analysis of Ce oxidation obtained from XANES for fresh and spent catalysts<sup>1, 2</sup>.

| Catalysts                                     | I <sup>I</sup> | I <sup>II</sup> | I <sup>III</sup> | %Ce <sup>3+</sup> |
|-----------------------------------------------|----------------|-----------------|------------------|-------------------|
| 1Pt/20CeO <sub>2</sub> -ZSM5-HIE-Fresh        | 5.79           | 5.353           | 3.044            | 65.5              |
| 1Pt/20CeO <sub>2</sub> -ZSM5-HIE-Spent        | 7.904          | 4.132           | 3.197            | 71.2              |
| 1Pt/20CeO <sub>2</sub> -Silicalite1-HIE-Fresh | 5.166          | 6.156           | 3.175            | 61.9              |
| 1Pt/20CeO <sub>2</sub> -Silicalite1-HIE-Spent | 5.451          | 5.66            | 3.309            | 62.2              |
| 1Pt/20CeO <sub>2</sub> -Silicalite1-CON-Fresh | 0.69           | 5.853           | 7.714            | 8.2               |
| 1Pt/20CeO <sub>2</sub> -Silicalite1-CON-Spent | 0.225          | 4.132           | 4.458            | 4.8               |
| 1Pt/CeO <sub>2</sub> -Fresh                   | 1.642          | 5.651           | 9.683            | 14.5              |
| 1Pt/CeO <sub>2</sub> -Spent                   | 1.426          | 1.898           | 5.815            | 19.7              |

\* Fittings of the experimental XANES spectra of the Ce L<sub>3</sub> edge of the synthesized samples.

\*\* The estimation of Ce<sup>3+</sup> concentration in the sample is calculated as follows:

%Ce<sup>3+</sup> = I<sup>I</sup>/(I<sup>I</sup>+I<sup>II</sup>+I<sup>III</sup>), where I<sup>I</sup>, I<sup>II</sup> and I<sup>III</sup> are the intensities of the different peaks.

## References

1. N. Qiu, J. Zhang, Z. Wu, T. Hu and P. Liu, *Crystal Growth & Design*, 2011, **12**, 629-634.
2. S. Phokha, S. Pinitsoontorn and S. Maensiri, *Nano-Micro Letters*, 2013, **5**, 223-233.
